# Supplementary material
Source: PubMed Central journal article supplement (PMC4384656)

**BTK**

**CD138**

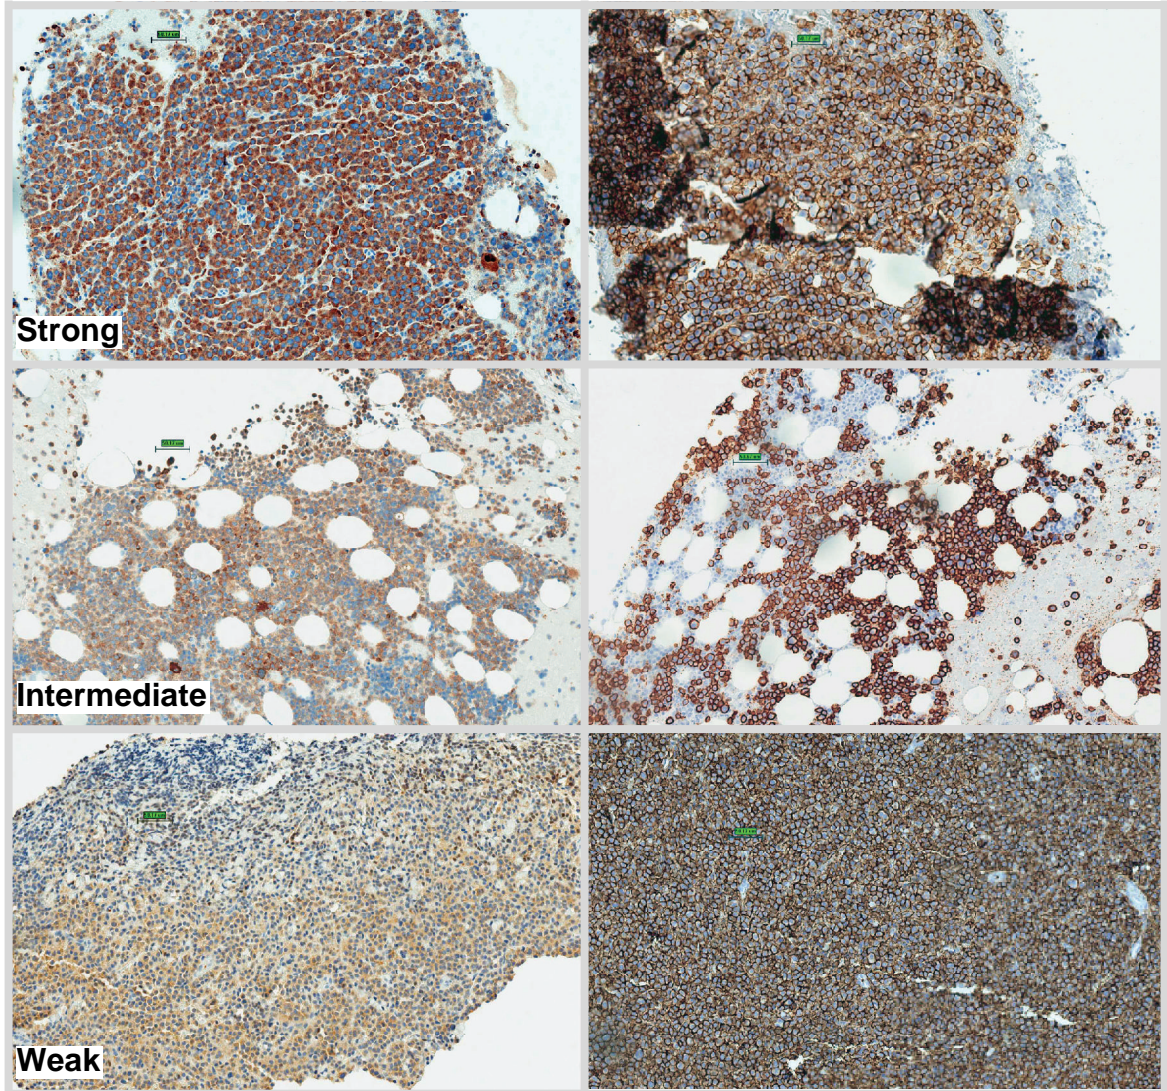

**Supplemental Figure 1**

Supplement: NIHMS670843-supplement-Supplemental_Figure1.pdf [file NIHMS670843-supplement-Supplemental_Figure1.pdf]
